# Supplementary material for: A Bayesian Analysis Framework for Decision Making with Interval Pairwise Comparison Judgments
Source: Atypon-hosted journal article supplement (doi:10.1287/deca.2024.0207), 2025-03-10
Supplement: deca.2024.0207.sm1.pdf [file deca.2024.0207.sm1.pdf]

## 1. Proof of Theorem 1

Let  $[X]$  denote the density of the random variable  $X$ , and  $[Y|X]$  that of the conditional distribution  $Y|X$ .

Given prior distribution (7)-(9), the joint distribution is:

$$\begin{aligned} & [\mathbf{Y}^-, \mathbf{Y}^+, \mathbf{u}, \phi, b] \\ &= [\phi][b|\phi][\mathbf{u}|\phi][\mathbf{Y}^-|\mathbf{u}, \phi, b][\mathbf{Y}^+|\mathbf{u}, \phi, b] \\ &\propto \phi^{\frac{2\|\mathbf{J}\|+n+q}{2}-1} \exp\left\{-\frac{\phi}{2}[a + \lambda_b(b - b^{prior})^2 + \lambda_u(\mathbf{u} - \mathbf{u}^{prior})^T(\mathbf{u} - \mathbf{u}^{prior}) \right. \\ &\quad \left. + (\mathbf{Y}^- - \mathbf{X}\mathbf{u} + b\mathbf{1})^T(\mathbf{Y}^- - \mathbf{X}\mathbf{u} + b\mathbf{1}) + (\mathbf{Y}^+ - \mathbf{X}\mathbf{u} - b\mathbf{1})^T(\mathbf{Y}^+ - \mathbf{X}\mathbf{u} - b\mathbf{1})\right\}. \end{aligned}$$

Then, the marginal distribution of parameters  $\mathbf{u}$ ,  $b$  and  $(\mathbf{u}, b)$  is derived as

$$\begin{aligned} [\mathbf{u}, b|\mathbf{Y}^-, \mathbf{Y}^+, \phi] &\propto \exp\left\{-\frac{\phi}{2}[\lambda_b(b - b^{prior})^2 + \lambda_u(\mathbf{u} - \mathbf{u}^{prior})^T(\mathbf{u} - \mathbf{u}^{prior}) \right. \\ &\quad \left. - 2b\mathbf{1}^T(\mathbf{Y}^+ - \mathbf{Y}^-) - 2\mathbf{u}^T\mathbf{X}^T(\mathbf{Y}^+ + \mathbf{Y}^-) \right. \\ &\quad \left. + 2b^2\mathbf{1}^T\mathbf{1} + 2\mathbf{u}^T\mathbf{X}^T\mathbf{X}\mathbf{u}\right\}, \end{aligned}$$

and

$$\begin{aligned} [\mathbf{u}|\mathbf{Y}^-, \mathbf{Y}^+, \phi, b] &\propto \exp\left\{-\frac{\phi}{2}[\lambda_u(\mathbf{u} - \mathbf{u}^{prior})^T(\mathbf{u} - \mathbf{u}^{prior}) - 2\mathbf{u}\mathbf{X}^T(\mathbf{Y}^+ + \mathbf{Y}^-) + 2\mathbf{u}^T\mathbf{X}^T\mathbf{X}\mathbf{u}]\right\} \\ &\propto \exp\left\{-\frac{\phi}{2}[\mathbf{u}^T(\lambda_u\mathbf{I} + 2\mathbf{X}^T\mathbf{X})\mathbf{u} - 2\mathbf{u}^T[\mathbf{X}^T(\mathbf{Y}^+ + \mathbf{Y}^-) + \lambda_u\mathbf{u}^{prior}]]\right\} \\ &\propto (2\pi)^{-\frac{n-1}{2}} \phi^{\frac{n-1}{2}} |\mathbf{S}_u|^{-\frac{1}{2}} \exp\left\{-\frac{\phi}{2}(\mathbf{u} - \mathbf{m}_u)^T\mathbf{S}_u^{-1}(\mathbf{u} - \mathbf{m}_u)\right\}, \end{aligned}$$

$$\begin{aligned} [b|\mathbf{Y}^-, \mathbf{Y}^+, \phi, \mathbf{u}] &\propto \exp\left\{-\frac{\phi}{2}[\lambda_b(b - b^{prior})^2 - 2b\mathbf{1}^T(\mathbf{Y}^+ - \mathbf{Y}^-) + 2b^2\mathbf{1}^T\mathbf{1}]\right\} \\ &\propto \exp\left\{-\frac{\phi}{2}[b^2(\lambda_b + 2\mathbf{1}^T\mathbf{1}) - 2b[\mathbf{1}^T(\mathbf{Y}^+ - \mathbf{Y}^-) + \lambda_b b^{prior}]]\right\} \\ &\propto (2\pi)^{-\frac{1}{2}} \phi^{\frac{1}{2}} s_b^{-\frac{1}{2}} \exp\left[-\frac{\phi}{2s_b}(b - m_b)^2\right], \end{aligned}$$

where

$$\begin{aligned} \mathbf{m}_u &= (\lambda_u\mathbf{I} + 2\mathbf{X}^T\mathbf{X})^{-1} [\mathbf{X}^T(\mathbf{Y}^- + \mathbf{Y}^+) + \lambda_u\mathbf{u}^{prior}], \mathbf{S}_u = (\lambda_u\mathbf{I} + 2\mathbf{X}^T\mathbf{X})^{-1}, \\ m_b &= \frac{\mathbf{1}^T(\mathbf{Y}^+ - \mathbf{Y}^-) + \lambda_b b^{prior}}{\lambda_b + 2\mathbf{1}^T\mathbf{1}}, s_b = \frac{1}{\lambda_b + 2\mathbf{1}^T\mathbf{1}}. \end{aligned}$$

It is obvious that  $\mathbf{u}$  and  $b$  are conditionally independent, i.e.

$$[b|\mathbf{Y}^-, \mathbf{Y}^+, \phi] = \frac{[\mathbf{u}, b|\mathbf{Y}^-, \mathbf{Y}^+, \phi]}{[\mathbf{u}|\mathbf{Y}^-, \mathbf{Y}^+, \phi, b]} = [b|\mathbf{Y}^-, \mathbf{Y}^+, \phi, \mathbf{u}],$$

$$[\mathbf{u}|\mathbf{Y}^-, \mathbf{Y}^+, \phi] = \frac{[\mathbf{u}, b|\mathbf{Y}^-, \mathbf{Y}^+, \phi]}{[b|\mathbf{Y}^-, \mathbf{Y}^+, \phi, \mathbf{u}]} = [\mathbf{u}|\mathbf{Y}^-, \mathbf{Y}^+, \phi, b],$$

and

$$\mathbf{u}|\mathbf{Y}^-, \mathbf{Y}^+, \phi \sim N_{n-1}(\mathbf{m}_u, \phi^{-1}\mathbf{S}_u),$$

$$b|\mathbf{Y}^-, \mathbf{Y}^+, \phi \sim N(m_b, \phi^{-1}s_b).$$

Consequently, the posterior of  $\phi$  is

$$\begin{aligned} & [\phi|\mathbf{Y}^-, \mathbf{Y}^+] \\ &= \frac{[\mathbf{Y}^-, \mathbf{Y}^+, \mathbf{u}, \phi, b]}{[\mathbf{u}, b|\mathbf{Y}^-, \mathbf{Y}^+, \phi]} \\ &\propto \phi^{\frac{2\|\mathbf{J}\|+q}{2}-1} \exp\left[-\frac{\phi}{2}\left(a + \mathbf{Y}^{-T}\mathbf{Y}^- + \mathbf{Y}^{+T}\mathbf{Y}^+ + \lambda_u\mathbf{u}^{priorT}\mathbf{u}^{prior} + \lambda_b(b^{prior})^2 - \mathbf{m}_u^T\mathbf{S}_u^{-1}\mathbf{m}_u - m_b^2/s_b\right)\right] \end{aligned}$$

Then

$$\phi | \mathbf{Y}^-, \mathbf{Y}^+ \sim G \left( \frac{2|\mathbb{J}| + q}{2}, \frac{a + \mathbf{Y}^{-T} \mathbf{Y}^- + \mathbf{Y}^{+T} \mathbf{Y}^+ + \lambda_u \mathbf{u}^{priorT} \mathbf{u}^{prior} + \lambda_b (b^{prior})^2 - \mathbf{m}_u^T \mathbf{S}_u^{-1} \mathbf{m}_u - m_b^2/s_b}{2} \right),$$

And, the posterior joint density of  $\mathbf{u}$  and  $\phi$  is

$$\begin{aligned} & [\mathbf{u}, \phi | \mathbf{Y}^-, \mathbf{Y}^+] \\ &= [\phi | \mathbf{Y}^-, \mathbf{Y}^+] [\mathbf{u} | \mathbf{Y}^-, \mathbf{Y}^+, \phi] \\ &\propto \phi^{\frac{2|\mathbb{J}|+q+n-1}{2}-1} \exp \left[ -\frac{\phi}{2} \left( a + \mathbf{Y}^{-T} \mathbf{Y}^- + \mathbf{Y}^{+T} \mathbf{Y}^+ + \lambda_u \mathbf{u}^{priorT} \mathbf{u}^{prior} + \lambda_b (b^{prior})^2 \right. \right. \\ &\quad \left. \left. - \mathbf{m}_u^T \mathbf{S}_u^{-1} \mathbf{m}_u - m_b^2/s_b + (\mathbf{u} - \mathbf{m}_u)^T \mathbf{S}_u^{-1} (\mathbf{u} - \mathbf{m}_u) \right) \right] \end{aligned}$$

The posterior marginal density function of  $\mathbf{u}$  is

$$\begin{aligned} & [\mathbf{u} | \mathbf{Y}^-, \mathbf{Y}^+] \\ &= \int_0^{+\infty} [\mathbf{u}, \phi | \mathbf{Y}^-, \mathbf{Y}^+] d\phi \\ &\propto \left[ a + \mathbf{Y}^{-T} \mathbf{Y}^- + \mathbf{Y}^{+T} \mathbf{Y}^+ + \lambda_u \mathbf{u}^{priorT} \mathbf{u}^{prior} + \lambda_b (b^{prior})^2 \right. \\ &\quad \left. - \mathbf{m}_u^T \mathbf{S}_u^{-1} \mathbf{m}_u - m_b^2/s_b + (\mathbf{u} - \mathbf{m}_u)^T \mathbf{S}_u^{-1} (\mathbf{u} - \mathbf{m}_u) \right]^{-\frac{2|\mathbb{J}|+q+n-1}{2}} \\ &\propto \left[ 1 + \frac{1}{2|\mathbb{J}|+q} (\mathbf{u} - \mathbf{m}_u)^T (s^2 \mathbf{S}_u)^{-1} (\mathbf{u} - \mathbf{m}_u) \right]^{-\frac{2|\mathbb{J}|+q+n-1}{2}}, \end{aligned}$$

It follows that the posterior distribution of  $\mathbf{u}$  is a multivariate t distribution, i.e.

$$\mathbf{u} | \mathbf{Y}^-, \mathbf{Y}^+ \sim T_{n-1} (\mathbf{m}_u, s^2 \mathbf{S}_u, 2|\mathbb{J}| + q),$$

where

$$s^2 = \frac{a + \mathbf{Y}^{-T} \mathbf{Y}^- + \mathbf{Y}^{+T} \mathbf{Y}^+ + \lambda_u \mathbf{u}^{priorT} \mathbf{u}^{prior} + \lambda_b ((b^{prior}))^2 - \mathbf{m}_u^T \mathbf{S}_u^{-1} \mathbf{m}_u - m_b^2/s_b}{2|\mathbb{J}| + q},$$

The posterior distribution of  $b$  is similarly derived:

$$b | \mathbf{Y}^-, \mathbf{Y}^+ \sim T_1 (m_b, s^2 s_b, 2|\mathbb{J}| + q).$$

## 2. Proof of Corollary 1

First, the following equation is proved.

$$\begin{aligned} \|\mathbf{Y}^- - \mathbf{X}\mathbf{u} + b\mathbf{1}\|^2 + \|\mathbf{Y}^+ - \mathbf{X}\mathbf{u} - b\mathbf{1}\|^2 &= \|\mathbf{Y}^- - \mathbf{X}\hat{\mathbf{m}}_u + \hat{m}_b\mathbf{1}\|^2 + \|\mathbf{Y}^+ - \mathbf{X}\hat{\mathbf{m}}_u - \hat{m}_b\mathbf{1}\|^2 \\ &\quad + 2\|\mathbf{X}\mathbf{u} - \mathbf{X}\hat{\mathbf{m}}_u\|^2 + 2\|b\mathbf{1} - \hat{m}_b\mathbf{1}\|^2. \end{aligned} \quad (1)$$

In accordance to Theorem 2, if the prior distributions are noninformative, i.e.,  $q \rightarrow 0$ ,  $a \rightarrow 0$ ,  $\lambda_M \rightarrow 0$  and  $\lambda_b \rightarrow 0$ , it is obvious that

$$\lim_{\lambda_u \rightarrow 0} \mathbf{m}_u = \lim_{\lambda_u \rightarrow 0} (\lambda_u \mathbf{I} + 2\mathbf{X}^T \mathbf{X})^{-1} [\mathbf{X}^T (\mathbf{Y}^- + \mathbf{Y}^+) + \lambda_u \mathbf{u}^{prior}] = (2\mathbf{X}^T \mathbf{X})^{-1} [\mathbf{X}^T (\mathbf{Y}^- + \mathbf{Y}^+)] = \hat{\mathbf{m}}_u,$$

$$\lim_{\lambda_b \rightarrow 0} m_b = \lim_{\lambda_u \rightarrow 0} \frac{\mathbf{1}^T (\mathbf{Y}^+ - \mathbf{Y}^-) + \lambda_b b^{prior}}{\lambda_b + 2\mathbf{1}^T \mathbf{1}} = \frac{\mathbf{1}^T (\mathbf{Y}^+ - \mathbf{Y}^-)}{2\mathbf{1}^T \mathbf{1}} = \hat{m}_b.$$

Furthermore, the following limits are proved

$$\begin{aligned} & \lim_{a, \lambda_u, \lambda_b \rightarrow 0} \left( a + \mathbf{Y}^{-T} \mathbf{Y}^- + \mathbf{Y}^{+T} \mathbf{Y}^+ + \lambda_u \mathbf{u}^{priorT} \mathbf{u}^{prior} + \lambda_b (b^{prior})^2 - \mathbf{m}_u^T \mathbf{S}_u^{-1} \mathbf{m}_u - m_b^2 / s_b \right) \\ &= \mathbf{Y}^{-T} \mathbf{Y}^- + \mathbf{Y}^{+T} \mathbf{Y}^+ - \widehat{\mathbf{m}}_u^T 2\mathbf{X}^T \mathbf{X} \widehat{\mathbf{m}}_u - \widehat{m}_b^2 \times 2\mathbf{1}^T \mathbf{1} \\ &= \|\mathbf{Y}^- - \mathbf{X} \widehat{\mathbf{m}}_u + \widehat{m}_b \mathbf{1}\|^2 + \|\mathbf{Y}^+ - \mathbf{X} \widehat{\mathbf{m}}_u - \widehat{m}_b \mathbf{1}\|^2 + 2\|\mathbf{X} \widehat{\mathbf{m}}_u\|^2 + 2\|\widehat{m}_b \mathbf{1}\|^2 - \widehat{\mathbf{m}}_u^T 2\mathbf{X}^T \mathbf{X} \widehat{\mathbf{m}}_u - \widehat{m}_b^2 \times 2\mathbf{1}^T \mathbf{1} \\ &= \|\mathbf{Y}^- - \mathbf{X} \widehat{\mathbf{m}}_u + \widehat{m}_b \mathbf{1}\|^2 + \|\mathbf{Y}^+ - \mathbf{X} \widehat{\mathbf{m}}_u - \widehat{m}_b \mathbf{1}\|^2, \\ & \lim_{q \rightarrow 0} (2|\mathbb{J}| + q) = 2|\mathbb{J}|. \end{aligned}$$

Thus, Corollary 2 is true.

### 3. Proof of Corollary 2

In accordance to Corollary 2, if the prior distribution is noninformative ( $q \rightarrow 0$ ,  $a \rightarrow 0$ ,  $\lambda_u \rightarrow 0$  and  $\lambda_b \rightarrow 0$ ) and all the judgments have been elicited by the DM ( $|\mathbb{J}| = n(n-1)/2$ ), then the posterior mean of  $b$  after observing the IMPCM  $\tilde{R}$  is computed as

$$\widehat{m}_b = (2\mathbf{1}^T \mathbf{1})^{-1} [\mathbf{1}^T (\mathbf{Y}^+ - \mathbf{Y}^-)] = \frac{\sum_{(i,j) \in \mathbb{J}} \ln r_{ij}^+ - \ln r_{ij}^-}{2|\mathbb{J}|} = \frac{1}{2} \times \frac{\sum_{(i,j) \in \mathbb{J}} \Delta_{ij}}{|\mathbb{J}|},$$

where  $\Delta_{ij} = \ln r_{ij}^+ - \ln r_{ij}^-$ . Considering the definition of IMPCM,  $\Delta_{ij} = \Delta_{ji}$ , we obtain

$$\widehat{m}_b = \frac{1}{2} \times \frac{\sum_{(i,j) \in \mathbb{J}} \Delta_{ij}}{|\mathbb{J}|} = \frac{1}{2} \times \frac{\sum_{i=1}^n \sum_{j=1}^n \Delta_{ij}}{n(n-1)} = \frac{1}{2} UI(\tilde{R}).$$

### 4. Proof of Corollary 3

For a complete IMPCM, according to the construction of  $\mathbf{X}$ , we obtain

$$\mathbf{X}^T \mathbf{X} = \begin{pmatrix} n-1 & -1 & \cdots & -1 \\ -1 & n-1 & \cdots & -1 \\ \vdots & \vdots & \ddots & \vdots \\ -1 & -1 & \cdots & n-1 \end{pmatrix}_{(n-1) \times (n-1)}.$$

whose inverse is

$$(\mathbf{X}^T \mathbf{X})^{-1} = \begin{pmatrix} \frac{2}{n} & \frac{1}{n} & \cdots & \frac{1}{n} \\ \frac{1}{n} & \frac{2}{n} & \cdots & \frac{1}{n} \\ \vdots & \vdots & \ddots & \vdots \\ \frac{1}{n} & \frac{1}{n} & \cdots & \frac{2}{n} \end{pmatrix}_{(n-1) \times (n-1)} = \frac{1}{n} (\mathbf{I} + \mathbf{1}).$$

Therefore, the posterior mean of  $\mathbf{u}$  after observing the MPCM  $R$  under noninformative priors is:

$$(2\mathbf{X}^T \mathbf{X})^{-1} [\mathbf{X}^T (\mathbf{Y}^- + \mathbf{Y}^+)] = (\mathbf{X}^T \mathbf{X})^{-1} [\mathbf{X}^T \frac{\mathbf{Y}^- + \mathbf{Y}^+}{2}],$$

i.e.

$$\begin{aligned} \mu_i &= \frac{\sum_{j=1}^n \ln(r_{ij}) + \sum_{i=1}^{n-1} \sum_{j=1}^n \ln(r_{ij})}{n}, \quad i = 1, 2, \dots, n-1, \\ \mu_n &= 0 = \frac{-\sum_{i=1}^{n-1} \sum_{j=1}^n \ln(r_{ij}) + \sum_{i=1}^{n-1} \sum_{j=1}^n \ln(r_{ij})}{n}. \end{aligned}$$

In accordance to the definition of MPCM,  $\ln(r_{ij}) = -\ln(r_{ji})$ , so

$$-\sum_{i=1}^{n-1} \sum_{j=1}^n \ln(r_{ij}) = \sum_{j=1}^n \ln(r_{nj}).$$

Thus,

$$w_i = \frac{\sqrt[n]{\prod_{j=1}^n r_{ij}} \times \sqrt[n]{\prod_{i=1}^{n-1} \prod_{j=1}^n r_{ij}}}{\sum_{i=1}^n \left( \sqrt[n]{\prod_{j=1}^n r_{ij}} \times \sqrt[n]{\prod_{i=1}^{n-1} \prod_{j=1}^n r_{ij}} \right)} = \frac{\sqrt[n]{\prod_{j=1}^n r_{ij}}}{\sum_{i=1}^n \left( \sqrt[n]{\prod_{j=1}^n r_{ij}} \right)}, \quad i = 1, 2, \dots, n.$$

From Corollary 2, it follows that:

$$\begin{aligned} \overline{\sigma^2} &= \frac{(\mathbf{Y}^- - \mathbf{X}\hat{\mathbf{m}}_u + \hat{\mathbf{m}}_b \mathbf{1})^T (\mathbf{Y}^- - \mathbf{X}\hat{\mathbf{m}}_u + \hat{\mathbf{m}}_b \mathbf{1}) + (\mathbf{Y}^+ - \mathbf{X}\hat{\mathbf{m}}_u - \hat{\mathbf{m}}_b \mathbf{1})^T (\mathbf{Y}^+ - \mathbf{X}\hat{\mathbf{m}}_u - \hat{\mathbf{m}}_b \mathbf{1})}{2|\mathbb{J}| - 2} \\ &= \frac{\mathbf{Y}^- = \mathbf{Y}^+, \hat{\mathbf{m}}_b = 0}{\sum_{(i,j) \in \mathbb{J}} [\ln(r_{ij}) - \ln(w_i) + \ln(w_j)]^2} \\ &= \frac{\sum_{i,j=1, i < j} [\ln(r_{ij}) - \ln(w_i) + \ln(w_j)]^2}{|\mathbb{J}| - 1} \\ &= \frac{\binom{n-1}{2} \text{GCI}(\mathbf{R})}{|\mathbb{J}| - 1} \\ &= \frac{|\mathbb{J}| = n(n-1)/2}{|\mathbb{J}| - 1} \text{GCI}(\mathbf{R}) \\ &\propto \text{GCI}(\mathbf{R}). \end{aligned}$$

## 5. Proof of Theorem 2

From Theorem 2, it follows that

$$\overline{\sigma^2} = E(\sigma^2 | \mathbf{Y}^-, \mathbf{Y}^+) = \frac{a + \mathbf{Y}^{-T} \mathbf{Y}^- + \mathbf{Y}^{+T} \mathbf{Y}^+ + \lambda_u \mathbf{u}^{priorT} \mathbf{u}^{prior} + \lambda_b (b^{prior})^2 - \mathbf{m}_u^T \mathbf{S}_u^{-1} \mathbf{m}_u - m_b^2 / s_b}{2|\mathbb{J}| + q - 2}.$$

According to (1),

$$\mathbf{Y}^{-T} \mathbf{Y}^- + \mathbf{Y}^{+T} \mathbf{Y}^+ = \|\mathbf{Y}^- - \mathbf{X}\hat{\mathbf{m}}_u + \hat{\mathbf{m}}_b \mathbf{1}\|^2 + \|\mathbf{Y}^+ - \mathbf{X}\hat{\mathbf{m}}_u - \hat{\mathbf{m}}_b \mathbf{1}\|^2 + 2\|\mathbf{X}\hat{\mathbf{m}}_u\|^2 + 2\|\hat{\mathbf{m}}_b \mathbf{1}\|^2,$$

then, the following result is obtained:

$$\begin{aligned} \overline{\sigma^2} &= \frac{1}{2|\mathbb{J}| + q - 2} \left[ a + \|\mathbf{Y}^- - \mathbf{X}\hat{\mathbf{m}}_u + \hat{\mathbf{m}}_b \mathbf{1}\|^2 + \|\mathbf{Y}^+ - \mathbf{X}\hat{\mathbf{m}}_u - \hat{\mathbf{m}}_b \mathbf{1}\|^2 \right. \\ &\quad \left. + 2\|\mathbf{X}\hat{\mathbf{m}}_u\|^2 + 2\|\hat{\mathbf{m}}_b \mathbf{1}\|^2 + \lambda_u \mathbf{u}^{priorT} \mathbf{u}^{prior} + \lambda_b (b^{prior})^2 - \mathbf{m}_u^T \mathbf{S}_u^{-1} \mathbf{m}_u - m_b^2 / s_b \right] \\ &= \frac{1}{2|\mathbb{J}| + q - 2} \left[ \|\mathbf{Y}^- - \mathbf{X}\hat{\mathbf{m}}_u + \hat{\mathbf{m}}_b \mathbf{1}\|^2 + \|\mathbf{Y}^+ - \mathbf{X}\hat{\mathbf{m}}_u - \hat{\mathbf{m}}_b \mathbf{1}\|^2 + C \right], \end{aligned}$$

where  $C = a + 2\|\mathbf{X}\hat{\mathbf{m}}_u\|^2 + 2\|\hat{\mathbf{m}}_b \mathbf{1}\|^2 + \lambda_u \mathbf{u}^{priorT} \mathbf{u}^{prior} + \lambda_b (b^{prior})^2 - \mathbf{m}_u^T \mathbf{S}_u^{-1} \mathbf{m}_u - m_b^2 / s_b$ . Furthermore,

$$\begin{aligned} \mathbf{m}_u^T \mathbf{S}_u^{-1} \mathbf{m}_u &= (\lambda_u \mathbf{u}^{priorT} + 2\hat{\mathbf{m}}_u^T \mathbf{X}^T \mathbf{X}) (2\mathbf{X}^T \mathbf{X} + \lambda_u \mathbf{I})^{-1} (2\mathbf{X}^T \mathbf{X} \mathbf{u}^{prior} + \lambda_u \mathbf{u}^{prior}) \\ &= \lambda_u^2 \mathbf{u}^{priorT} (2\mathbf{X}^T \mathbf{X} + \lambda_u \mathbf{I})^{-1} \mathbf{u}^{prior} \\ &\quad + 4\hat{\mathbf{m}}_u^T \mathbf{X}^T \mathbf{X} (2\mathbf{X}^T \mathbf{X} + \lambda_u \mathbf{I})^{-1} \mathbf{X}^T \mathbf{X} \hat{\mathbf{m}}_u \\ &\quad + 4\lambda_u \hat{\mathbf{m}}_u^T \mathbf{X}^T \mathbf{X} (2\mathbf{X}^T \mathbf{X} + \lambda_u \mathbf{I})^{-1} \mathbf{u}^{prior} \\ &= \lambda_u \mathbf{u}^{priorT} \mathbf{A}^{-1} (2\mathbf{X}^T \mathbf{X})^{-1} \mathbf{u}^{prior} + \frac{1}{\lambda_u} \hat{\mathbf{m}}_u^T (2\mathbf{X}^T \mathbf{X}) \mathbf{A}^{-1} \hat{\mathbf{m}}_u + 2\hat{\mathbf{m}}_u^T \mathbf{A}^{-1} \mathbf{u}^{prior}, \end{aligned}$$

where  $\mathbf{A}^{-1} = [(2\mathbf{X}^T \mathbf{X})^{-1} + (\lambda_u \mathbf{I})^{-1}]^{-1}$ . Similarly,

$$m_b^2 / s_b = \lambda_b (b^{prior})^2 B^{-1} (2\mathbf{1}^T \mathbf{1})^{-1} + \frac{1}{\lambda_b} \hat{m}_b^2 (2\mathbf{1}^T \mathbf{1}) B^{-1} \hat{m}_b + 2\hat{m}_b b^{prior} B^{-1},$$

in which  $B^{-1} = [(2\mathbf{1}^T\mathbf{1})^{-1} + \lambda_b^{-1}]^{-1}$ . Finally, it is proved that

$$\begin{aligned}
C &= a + 2\widehat{\mathbf{m}}_u^T \mathbf{X}^T \mathbf{X} \widehat{\mathbf{m}}_u + 2\widehat{m}_b^2 \mathbf{1}^T \mathbf{1} + \lambda_u \mathbf{u}^{prior T} \mathbf{u}^{prior} + \lambda_b (b^{prior})^2 - \mathbf{m}_u^T \mathbf{S}_u^{-1} \mathbf{m}_u - m_b^2 / s_b \\
&= a + 2\widehat{\mathbf{m}}_u^T \mathbf{A}^{-1} \mathbf{A} \mathbf{X}^T \mathbf{X} \widehat{\mathbf{m}}_u + 2\widehat{m}_b^2 B^{-1} B \mathbf{1}^T \mathbf{1} + \lambda_u \mathbf{u}^{prior T} \mathbf{A}^{-1} \mathbf{A} \mathbf{u}^{prior} + \lambda_b (b^{prior})^2 B^{-1} B \\
&\quad - \lambda_u \mathbf{u}^{prior T} \mathbf{A}^{-1} (2\mathbf{X}^T \mathbf{X})^{-1} \mathbf{u}^{prior} - \frac{1}{\lambda_u} \widehat{\mathbf{m}}_u^T (2\mathbf{X}^T \mathbf{X}) \mathbf{A}^{-1} \widehat{\mathbf{m}}_u - 2\widehat{\mathbf{m}}_u^T \mathbf{A}^{-1} \mathbf{u}^{prior} \\
&\quad - \lambda_b (b^{prior})^2 B^{-1} (2\mathbf{1}^T \mathbf{1})^{-1} - \frac{1}{\lambda_b} \widehat{m}_b^2 (2\mathbf{1}^T \mathbf{1}) B^{-1} \widehat{m}_b - 2\widehat{m}_b b^{prior} B^{-1} \\
&= a + 2\widehat{\mathbf{m}}_u^T \mathbf{A}^{-1} [(2\mathbf{X}^T \mathbf{X})^{-1} + (\lambda_u \mathbf{I})^{-1}] \mathbf{X}^T \mathbf{X} \widehat{\mathbf{m}}_u + 2\widehat{m}_b^2 B^{-1} [(2\mathbf{1}^T \mathbf{1})^{-1} + \lambda_b^{-1}] \mathbf{1}^T \mathbf{1} \\
&\quad + \lambda_u \mathbf{u}^{prior T} \mathbf{A}^{-1} [(2\mathbf{X}^T \mathbf{X})^{-1} + (\lambda_u \mathbf{I})^{-1}] \mathbf{u}^{prior} + \lambda_b (b^{prior})^2 B^{-1} [(2\mathbf{1}^T \mathbf{1})^{-1} + \lambda_b^{-1}] \\
&\quad - \lambda_u \mathbf{u}^{prior T} \mathbf{A}^{-1} (2\mathbf{X}^T \mathbf{X})^{-1} \mathbf{u}^{prior} - \frac{1}{\lambda_u} \widehat{\mathbf{m}}_u^T (2\mathbf{X}^T \mathbf{X}) \mathbf{A}^{-1} \widehat{\mathbf{m}}_u - 2\widehat{\mathbf{m}}_u^T \mathbf{A}^{-1} \mathbf{u}^{prior} \\
&\quad - \lambda_b (b^{prior})^2 B^{-1} (2\mathbf{1}^T \mathbf{1})^{-1} - \frac{1}{\lambda_b} \widehat{m}_b^2 (2\mathbf{1}^T \mathbf{1}) B^{-1} \widehat{m}_b - 2\widehat{m}_b b^{prior} B^{-1} \\
&= a + \widehat{\mathbf{m}}_u^T \mathbf{A}^{-1} [\mathbf{I} + (\lambda_u)^{-1} (2\mathbf{X}^T \mathbf{X})] \widehat{\mathbf{m}}_u + \widehat{m}_b^2 B^{-1} [1 + \lambda_b^{-1} (2\mathbf{1}^T \mathbf{1})] \\
&\quad + \mathbf{u}^{prior T} \mathbf{A}^{-1} [\lambda_u (2\mathbf{X}^T \mathbf{X})^{-1} + \mathbf{I}] \mathbf{u}^{prior} + (b^{prior})^2 B^{-1} [\lambda_b (2\mathbf{1}^T \mathbf{1})^{-1} + 1] \\
&\quad - \lambda_u \mathbf{u}^{prior T} \mathbf{A}^{-1} (2\mathbf{X}^T \mathbf{X})^{-1} \mathbf{u}^{prior} - \frac{1}{\lambda_u} \widehat{\mathbf{m}}_u^T (2\mathbf{X}^T \mathbf{X}) \mathbf{A}^{-1} \widehat{\mathbf{m}}_u - 2\widehat{\mathbf{m}}_u^T \mathbf{A}^{-1} \mathbf{u}^{prior} \\
&\quad - \lambda_b (b^{prior})^2 B^{-1} (2\mathbf{1}^T \mathbf{1})^{-1} - \frac{1}{\lambda_b} \widehat{m}_b^2 (2\mathbf{1}^T \mathbf{1}) B^{-1} \widehat{m}_b - 2\widehat{m}_b b^{prior} B^{-1} \\
&= a + (\widehat{\mathbf{m}}_u - \mathbf{u}^{prior})^T \mathbf{A}^{-1} (\widehat{\mathbf{m}}_u - \mathbf{u}^{prior}) + (\widehat{m}_b - b^{prior})^2 B^{-1}.
\end{aligned}$$

Thus, the posterior mean of  $\phi$  is

$$\begin{aligned}
\bar{\sigma}^2 &= \frac{\|\mathbf{Y}^- - \mathbf{X}\widehat{\mathbf{m}}_u + \widehat{m}_b \mathbf{1}\|^2 + \|\mathbf{Y}^+ - \mathbf{X}\widehat{\mathbf{m}}_u - \widehat{m}_b \mathbf{1}\|^2}{2|\mathbb{J}| + q - 2} \\
&\quad + \frac{a + (\mathbf{u}^{prior} - \widehat{\mathbf{m}}_u)^T \mathbf{A}^{-1} (\mathbf{u}^{prior} - \widehat{\mathbf{m}}_u) + (b^{prior} - \widehat{m}_b)^2 B^{-1}}{2|\mathbb{J}| + q - 2},
\end{aligned}$$

and

$$\begin{aligned}
\text{PCI}(\tilde{R}) &= \frac{|\mathbb{J}| - 1}{|\mathbb{J}| - n + 1} \left( \frac{\|\mathbf{Y}^- - \mathbf{X}\widehat{\mathbf{m}}_u + \widehat{m}_b \mathbf{1}\|^2 + \|\mathbf{Y}^+ - \mathbf{X}\widehat{\mathbf{m}}_u - \widehat{m}_b \mathbf{1}\|^2}{2|\mathbb{J}| + q - 2} \right. \\
&\quad \left. + \frac{a + (\mathbf{u}^{prior} - \widehat{\mathbf{m}}_u)^T \mathbf{A}^{-1} (\mathbf{u}^{prior} - \widehat{\mathbf{m}}_u) + (b^{prior} - \widehat{m}_b)^2 B^{-1}}{2|\mathbb{J}| + q - 2} \right) \\
&= \text{LCI}(\tilde{R}) + \text{PrCI}(\tilde{R}).
\end{aligned} \tag{2}$$

## 6. Proof of Theorem 3

The proof of results (1), (3) and (4) are evident. Using the following partial derivatives

$$\begin{aligned}
\frac{\partial \text{PrCI}(\tilde{R})}{\partial \lambda_u} &= \frac{|\mathbb{J}| - 1}{(|\mathbb{J}| - n + 1)(2|\mathbb{J}| + q - 2)} (\mathbf{u}^{prior} - \widehat{\mathbf{m}}_u)^T \frac{\partial \mathbf{A}^{-1}}{\partial \lambda_u} (\mathbf{u}^{prior} - \widehat{\mathbf{m}}_u) \\
&= \frac{|\mathbb{J}| - 1}{(|\mathbb{J}| - n + 1)(2|\mathbb{J}| + q - 2)} \\
&\quad \times (\mathbf{u}^{prior} - \widehat{\mathbf{m}}_u)^T [(2\mathbf{X}^T \mathbf{X})^{-1} + (\lambda_u \mathbf{I})^{-1}]^{-1} (\lambda_u \mathbf{I})^{-1} (\lambda_u \mathbf{I})^{-1} [(2\mathbf{X}^T \mathbf{X})^{-1} + (\lambda_u \mathbf{I})^{-1}]^{-1} (\mathbf{u}^{prior} - \widehat{\mathbf{m}}_u), \\
\frac{\partial \text{PrCI}(\tilde{R})}{\partial \lambda_b} &= \frac{|\mathbb{J}| - 1}{|\mathbb{J}| - n + 1} \frac{(b^{prior} - \widehat{m}_b)^2}{2|\mathbb{J}| + q - 2} \frac{\partial B^{-1}}{\partial \lambda_b} \\
&= \frac{|\mathbb{J}| - 1}{|\mathbb{J}| - n + 1} \frac{(b^{prior} - \widehat{m}_b)^2}{2|\mathbb{J}| + q - 2} \frac{1}{\lambda_b^2 [(2\mathbf{1}^T \mathbf{1})^{-1} + \lambda_b^{-1}]^2} > 0.
\end{aligned}$$

As  $F = [(2\mathbf{X}^T \mathbf{X})^{-1} + (\lambda_u \mathbf{I})^{-1}]^{-1} (\lambda_u \mathbf{I})^{-1}$  is nonsingular, it is evident that  $x^T F^T F x$  is a positive definite quadratic form. Therefore, the result (2) are proved.
